# Supplementary figures and images for: Multiomics Revealed the Multi-Dimensional Effects of Late Sleep on Gut Microbiota and Metabolites in Children in Northwest China
Source: MDPI journal article supplement (doi:10.3390/nu15204315), 2023-10-10

A

Significant metabolism(Blood)

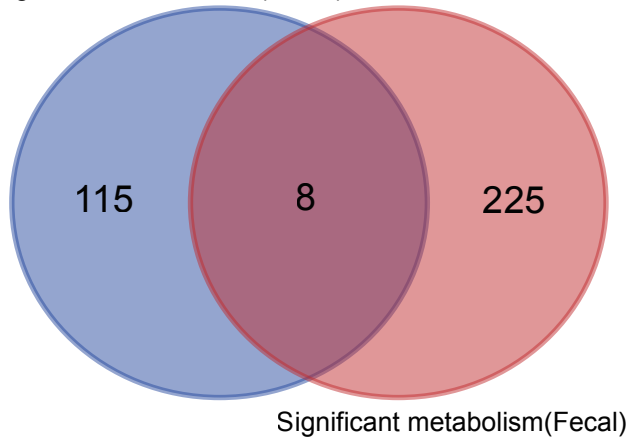

B

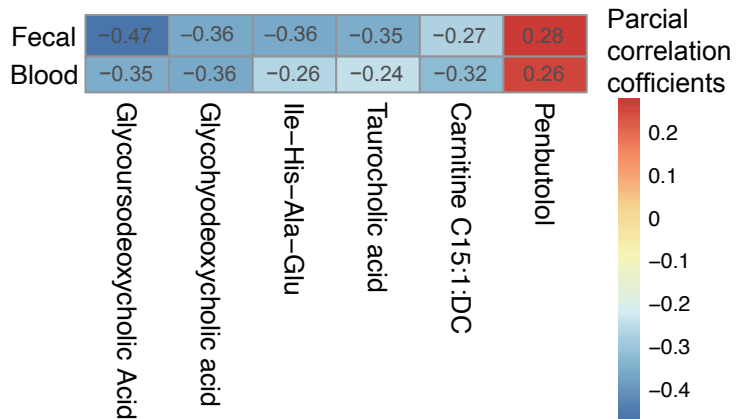

Supplement: s1 [file s1]

A

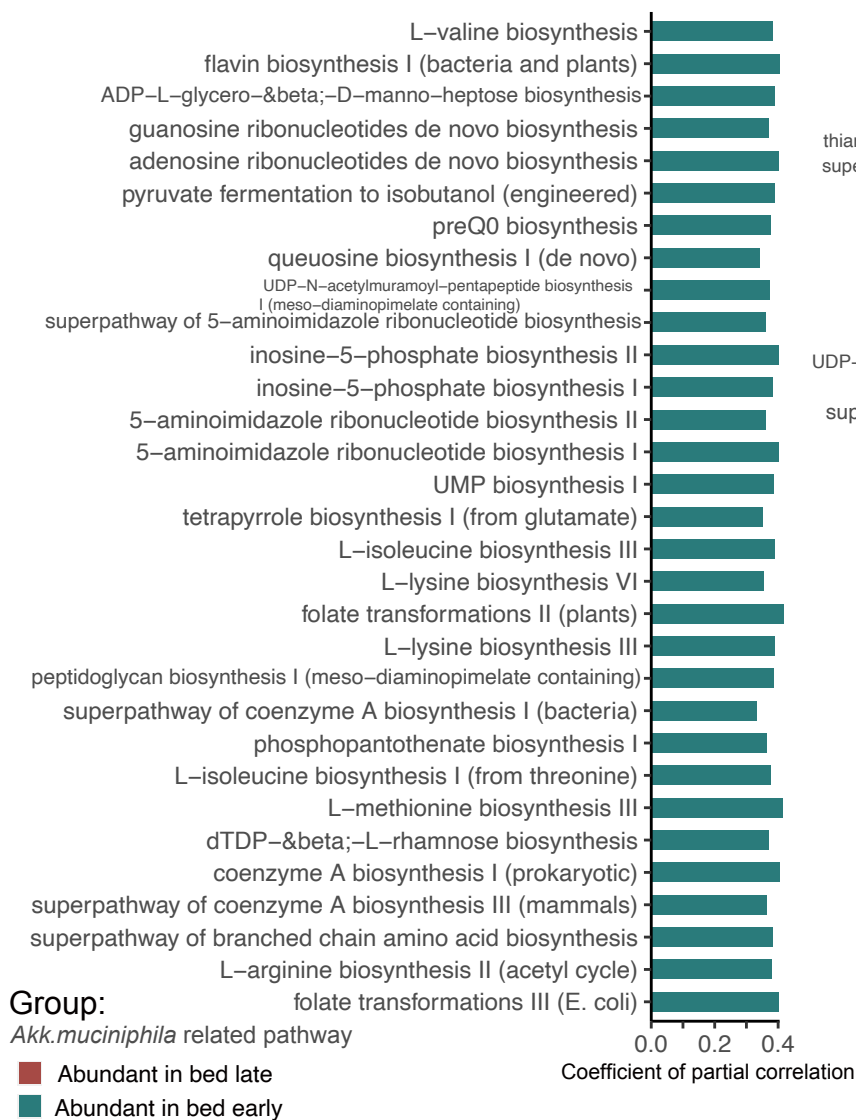

B

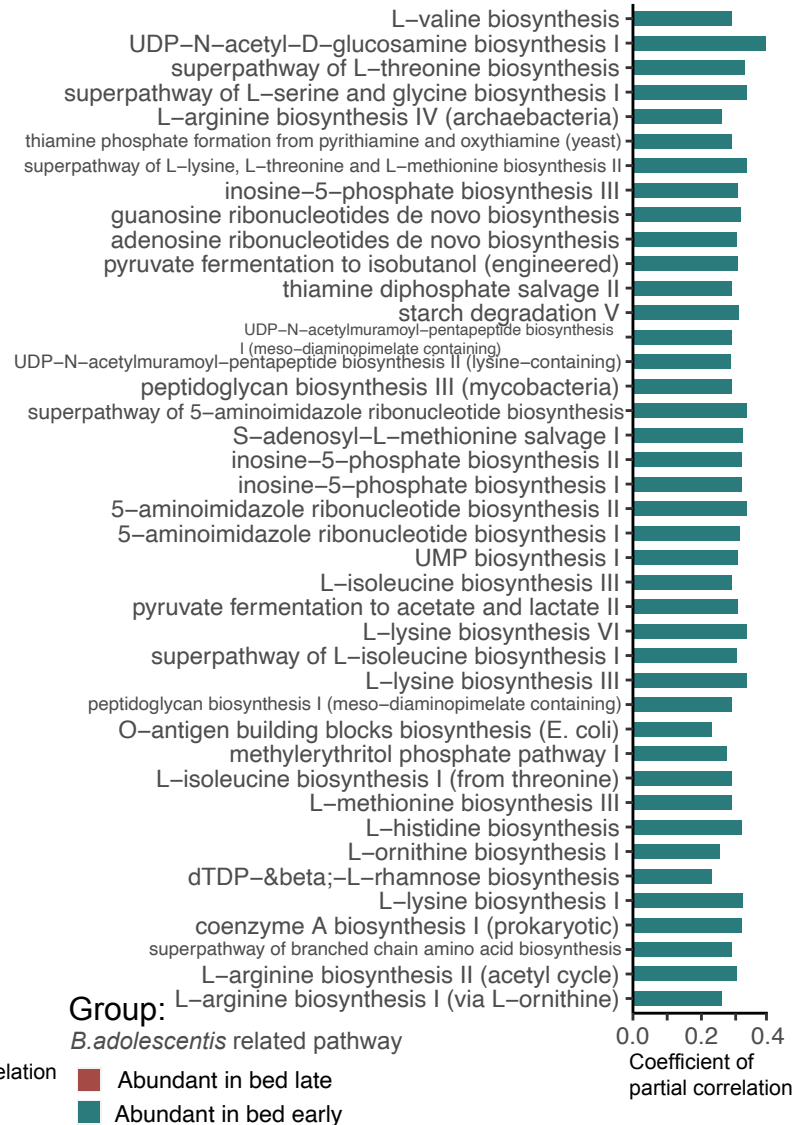

C

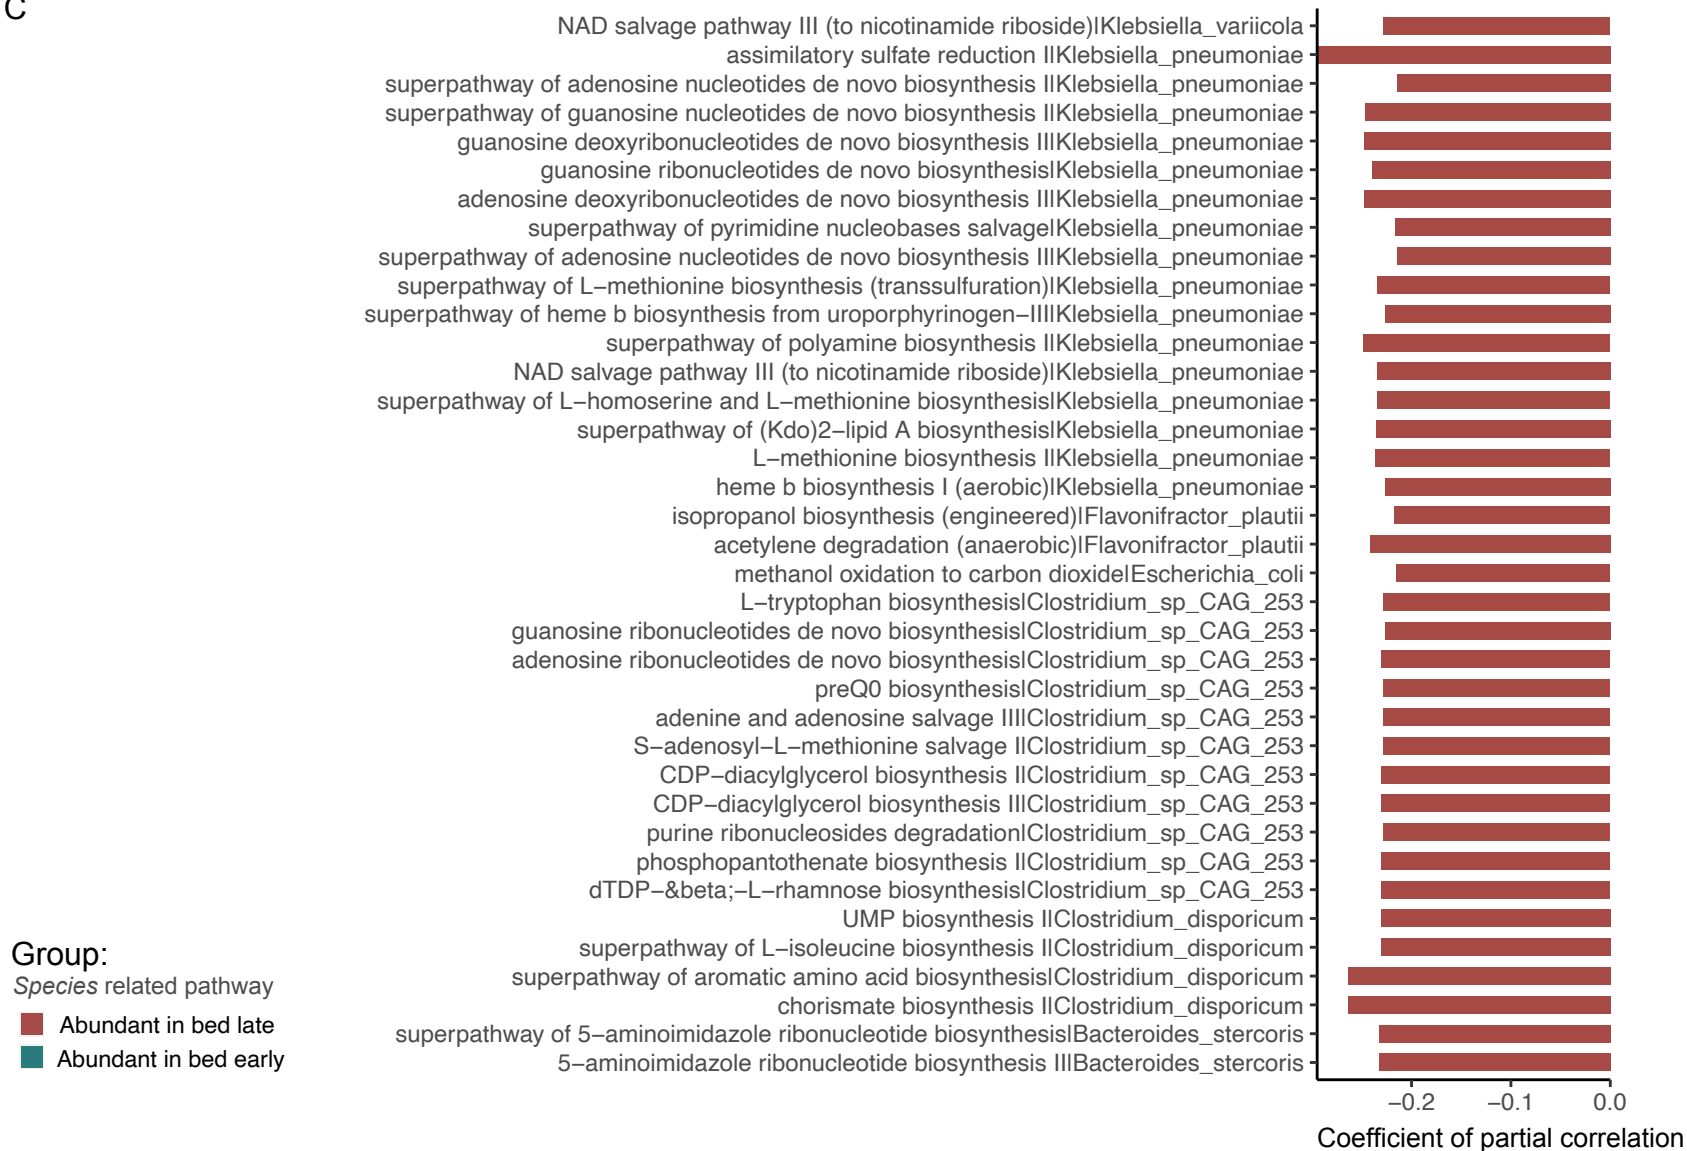

Supplement: s1 [file s1]

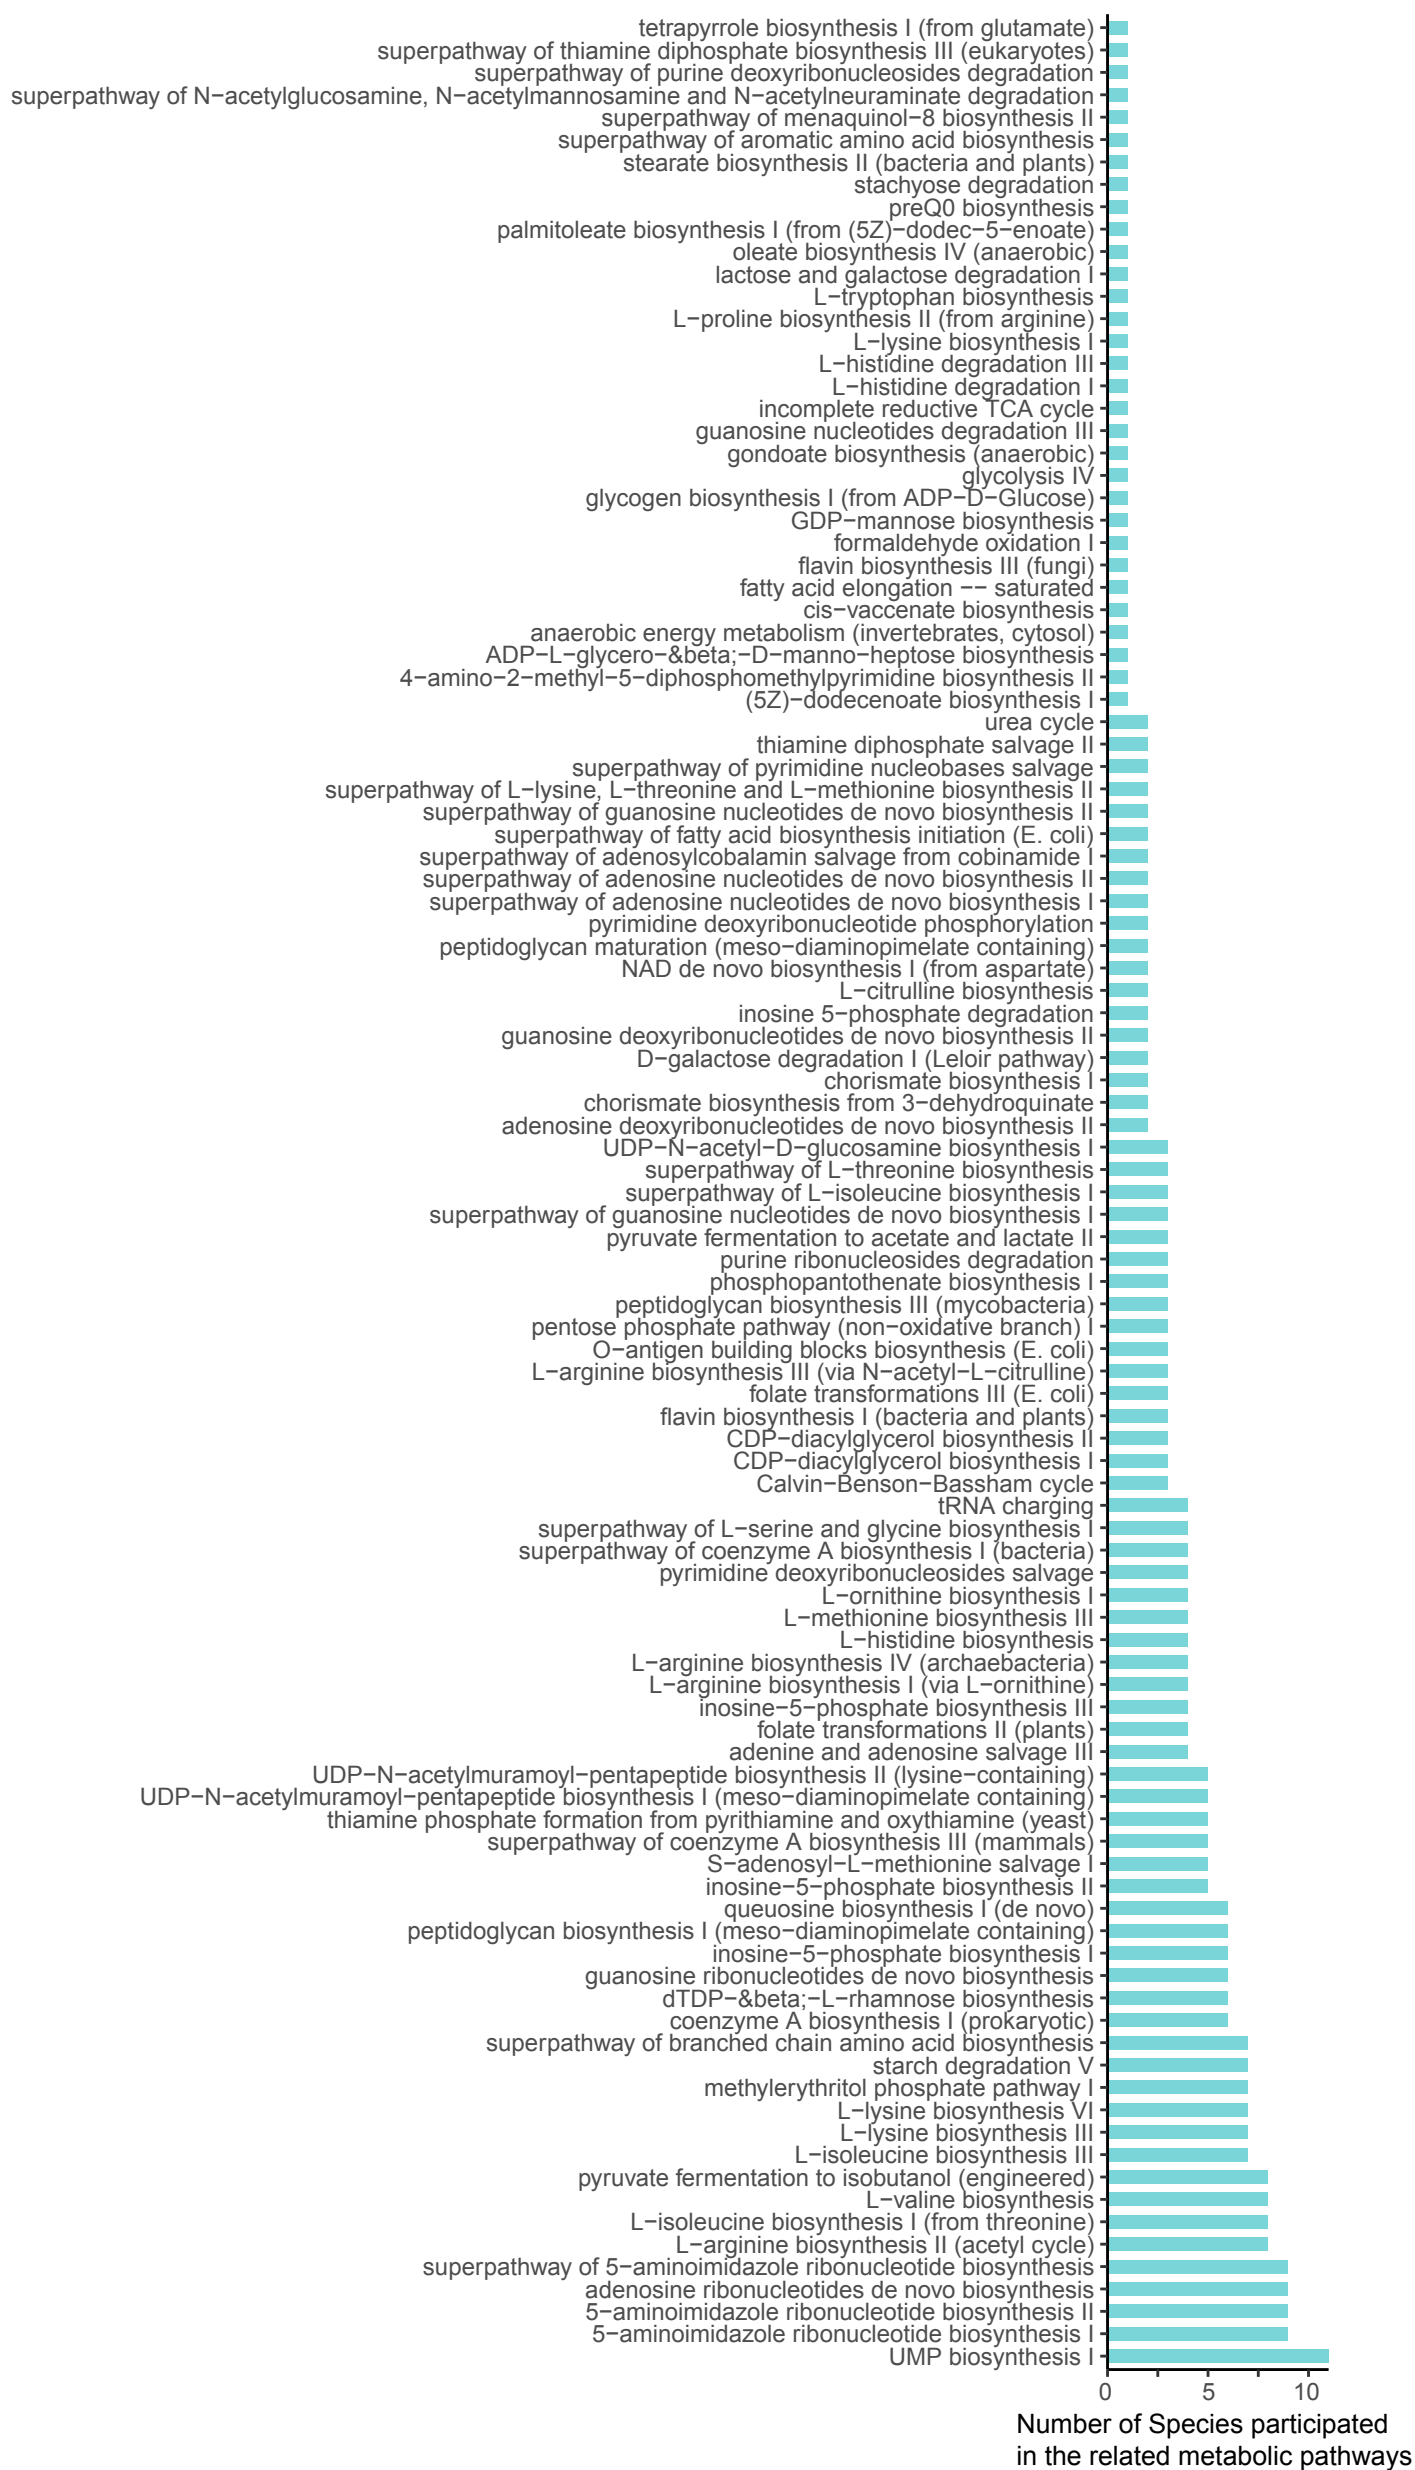

Supplement: s1 [file s1]

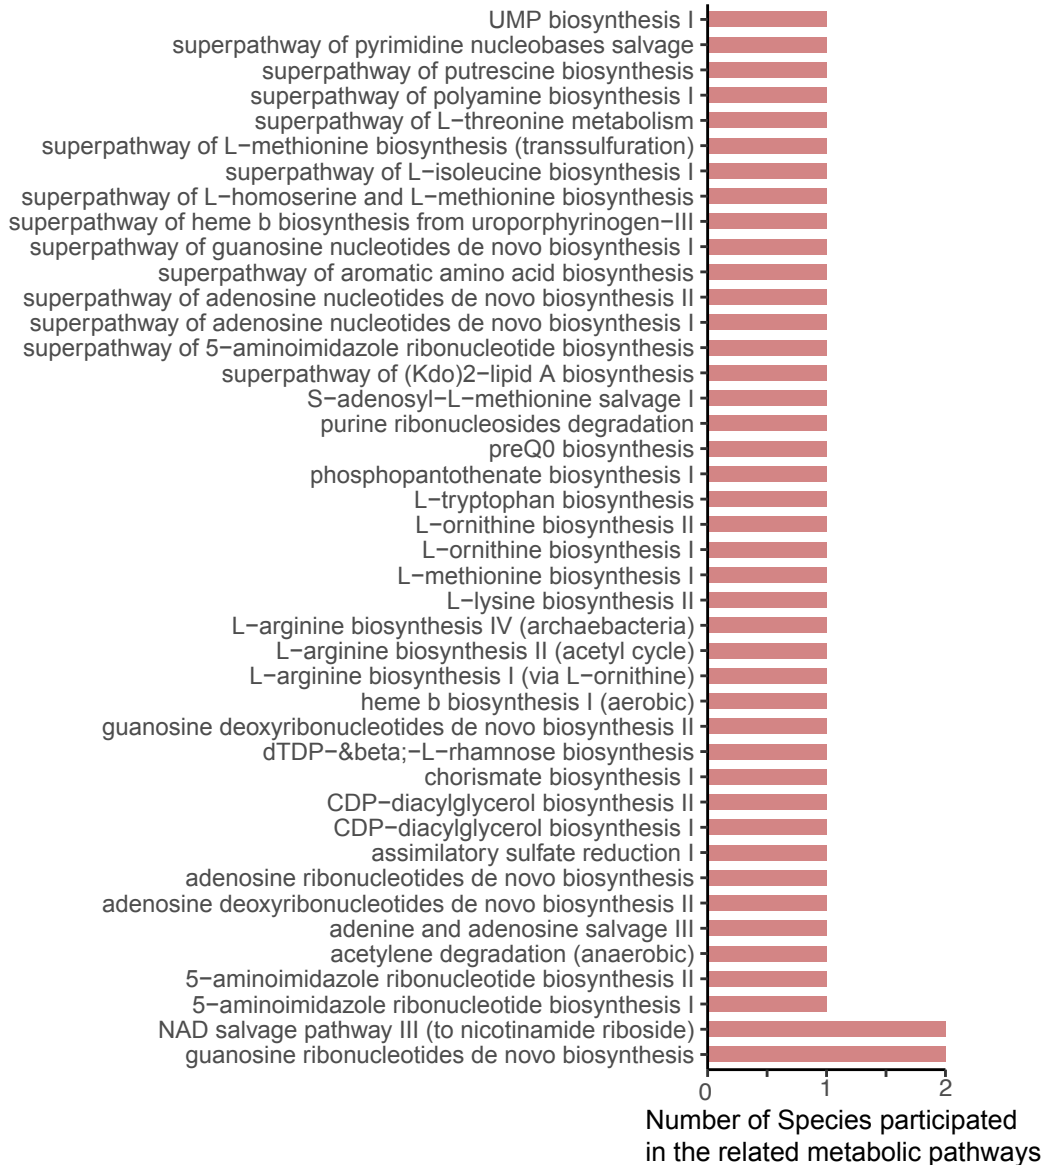

Supplement: s1 [file s1]

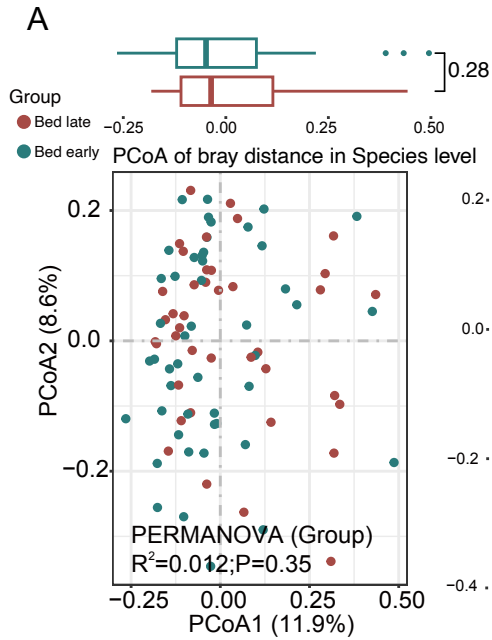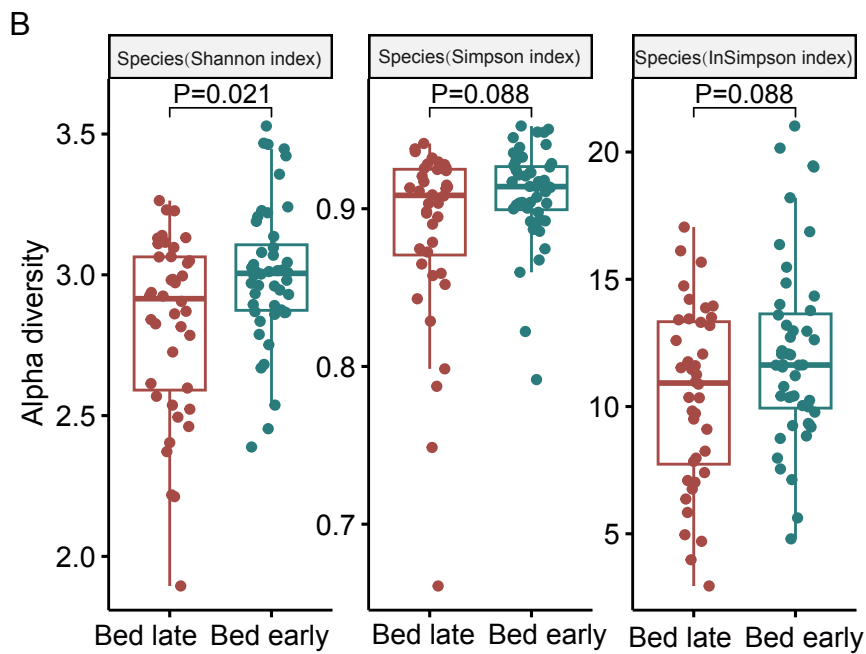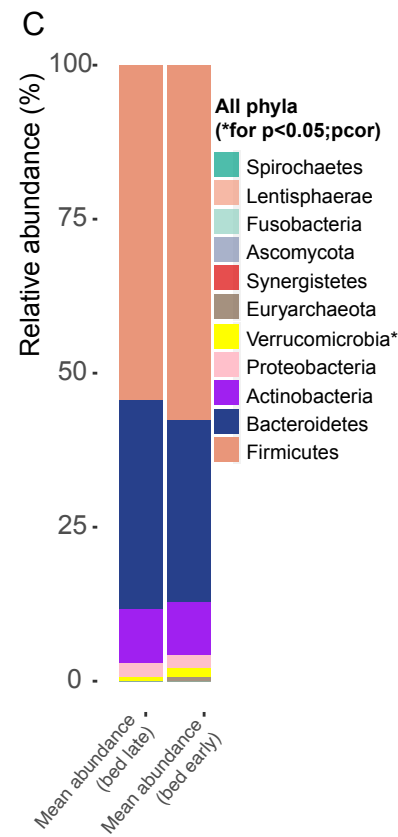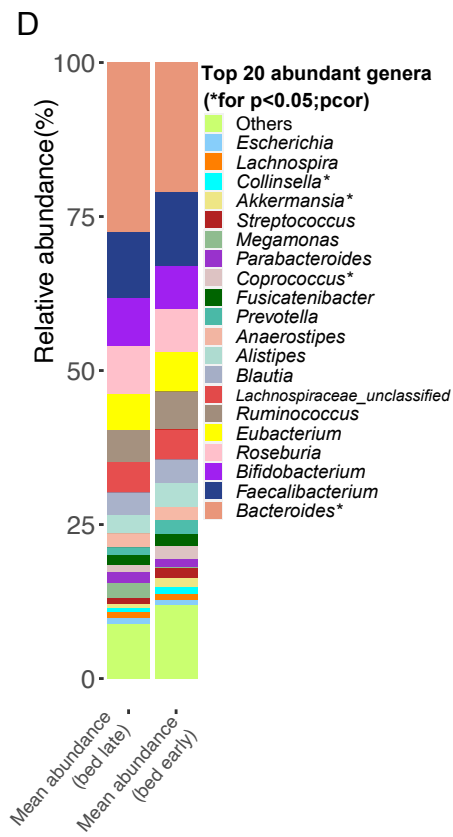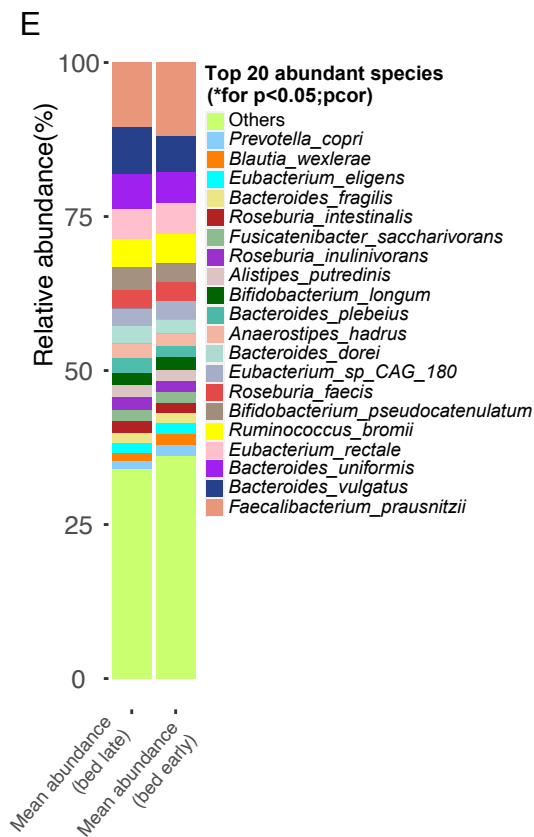

Supplement: s1 [file s1]
